# Supplementary material for: Untargeted massspectrometry based lipidomics analysis reveals altered lipid profiles in a scribble knockdown-induced colorectal cancer model of Drosophila
Source: Research Square preprint supplement (doi:10.21203/rs.3.rs-3826385/v1), 2024-01-03
Supplement: Supplementary file 1 [file e713ab344bd099c811b9450d.docx]

**(Supplementary Data)**

**Untargeted massspectrometry based lipidomics analysis reveals altered lipid profiles in a scribble knockdown-induced colorectal cancer model of Drosophila**

Rohit Kumar1, Zeeshan Fatima*2,3, Pradeep Kumar1, Prabhat Kumar1, Brijesh Singh Chauhan1, Saripella Srikrishna*1

1. Cancer and Neurobiology laboratory, Department of Biochemistry, Institute of Science, Banaras Hindu University, Varanasi-221005.
2. Amity Institute of Biotechnology, Amity University, Manesar, Gurugram, Haryana-122413, India.
3. Department of Medical Laboratory Sciences, College of Applied Medical Sciences, University of Bisha, Bisha 61922, Saudi Arabia.

***Address for correspondence:**

**1. Saripella Srikrishna, Ph.D.**

Cancer and Neurobiology Laboratory

Department of Biochemistry, Institute of Science

Banaras Hindu University, Varanasi 221005, Uttar Pradesh, India

E-mail: [skrishna@bhu.ac.in](mailto:skrishna@bhu.ac.in)

**2. Zeeshan Fatima, Ph.D.**

Amity Institute of Biotechnology

Amity University, Manesar, Gurugram, Haryana-122413, India

E-mail: drzeeshanfatima@gmail.com


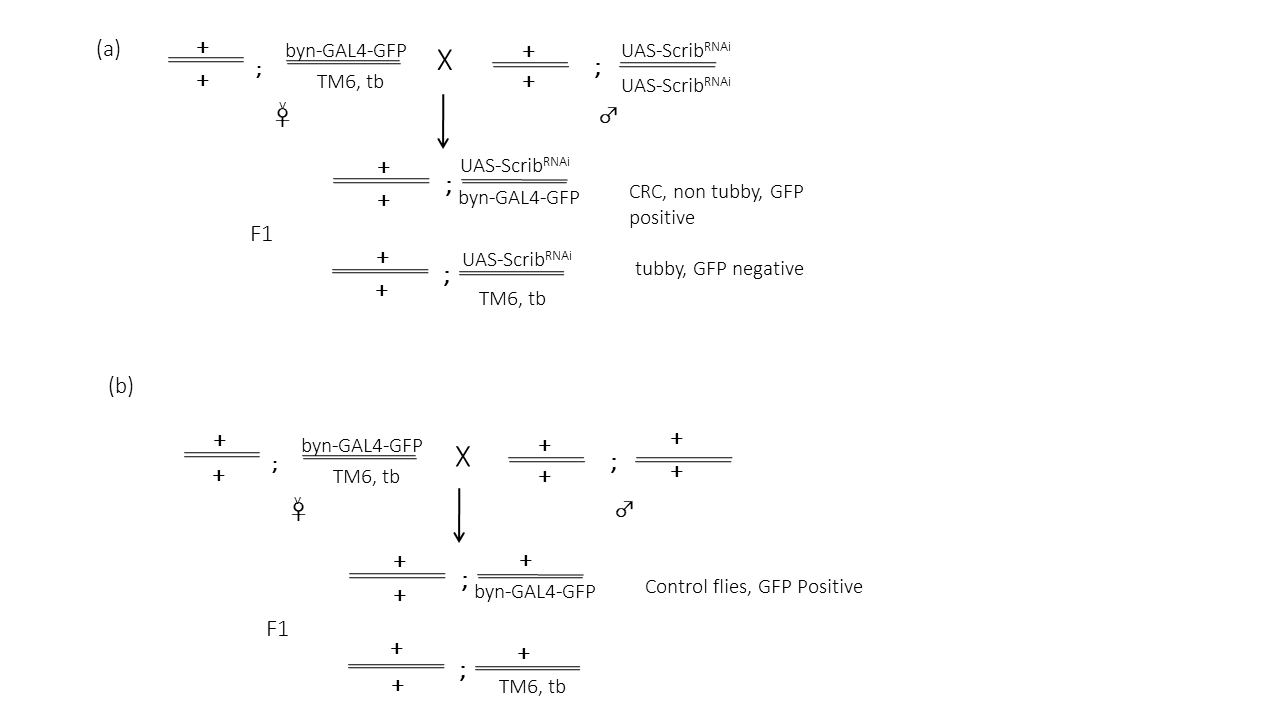


**Fig. S1. Crossing scheme for generating Scribble knockdown in hindgut. UAS-ScribRNAi/bynGAL4 flies were denoted as CRC flies. bynGAL/+ flies representing Wild type flies.**

**Fig. S2. representing Scrib mRNA level in hindgut of three days old adult female fly. The data represented in SEM, **p< 0.01**


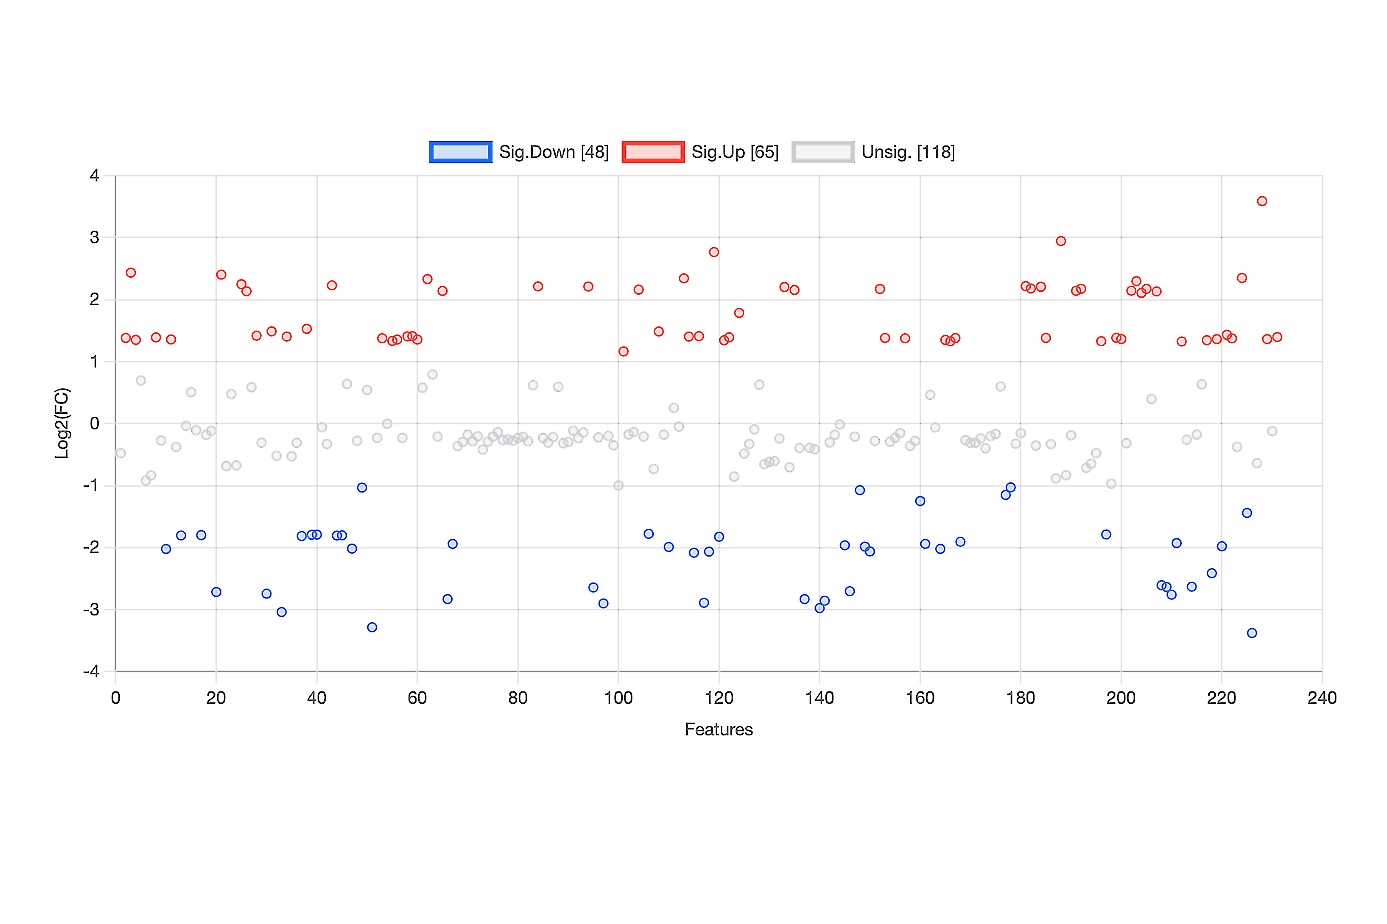


A


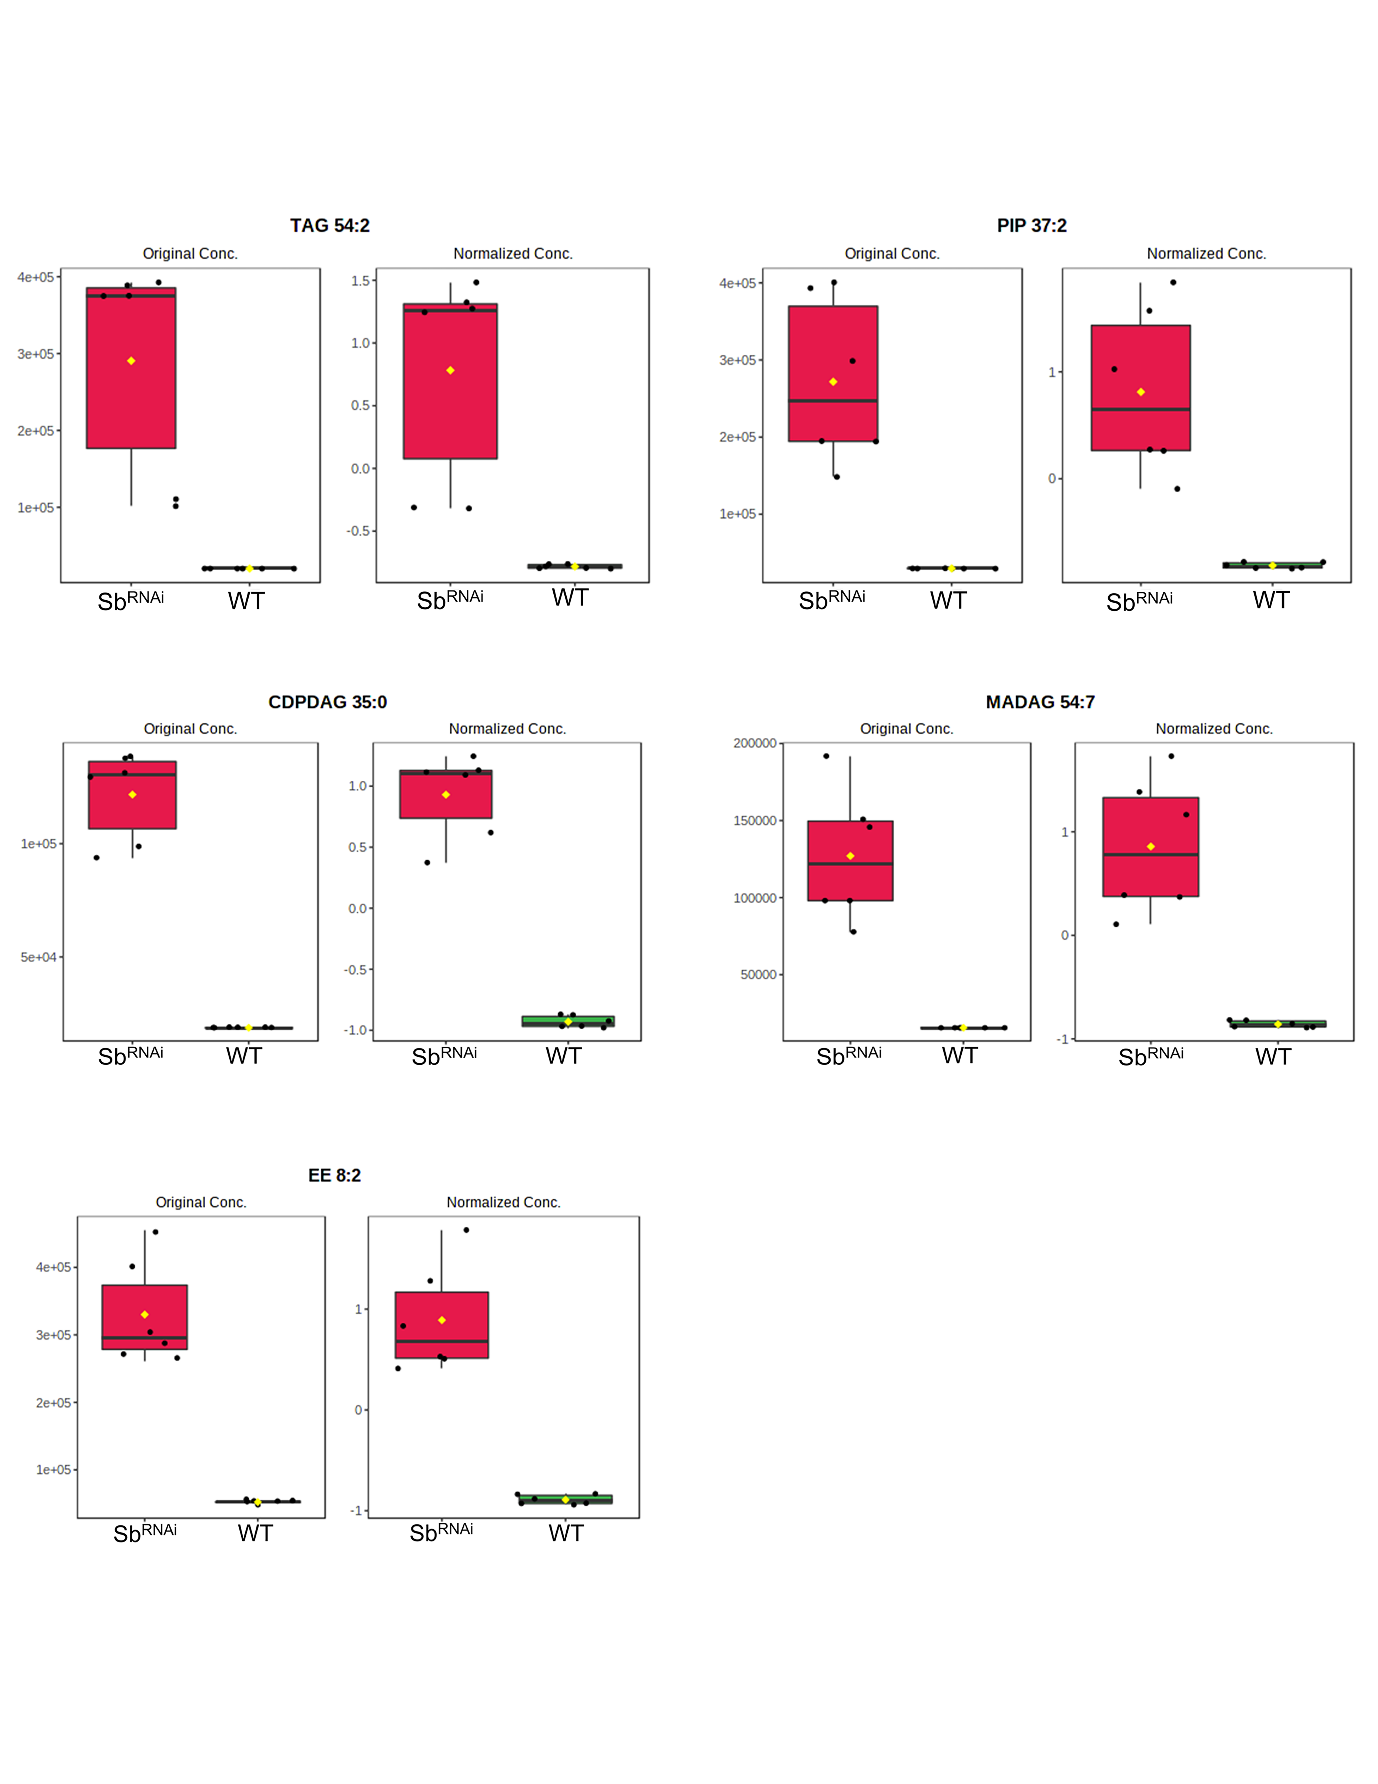


B


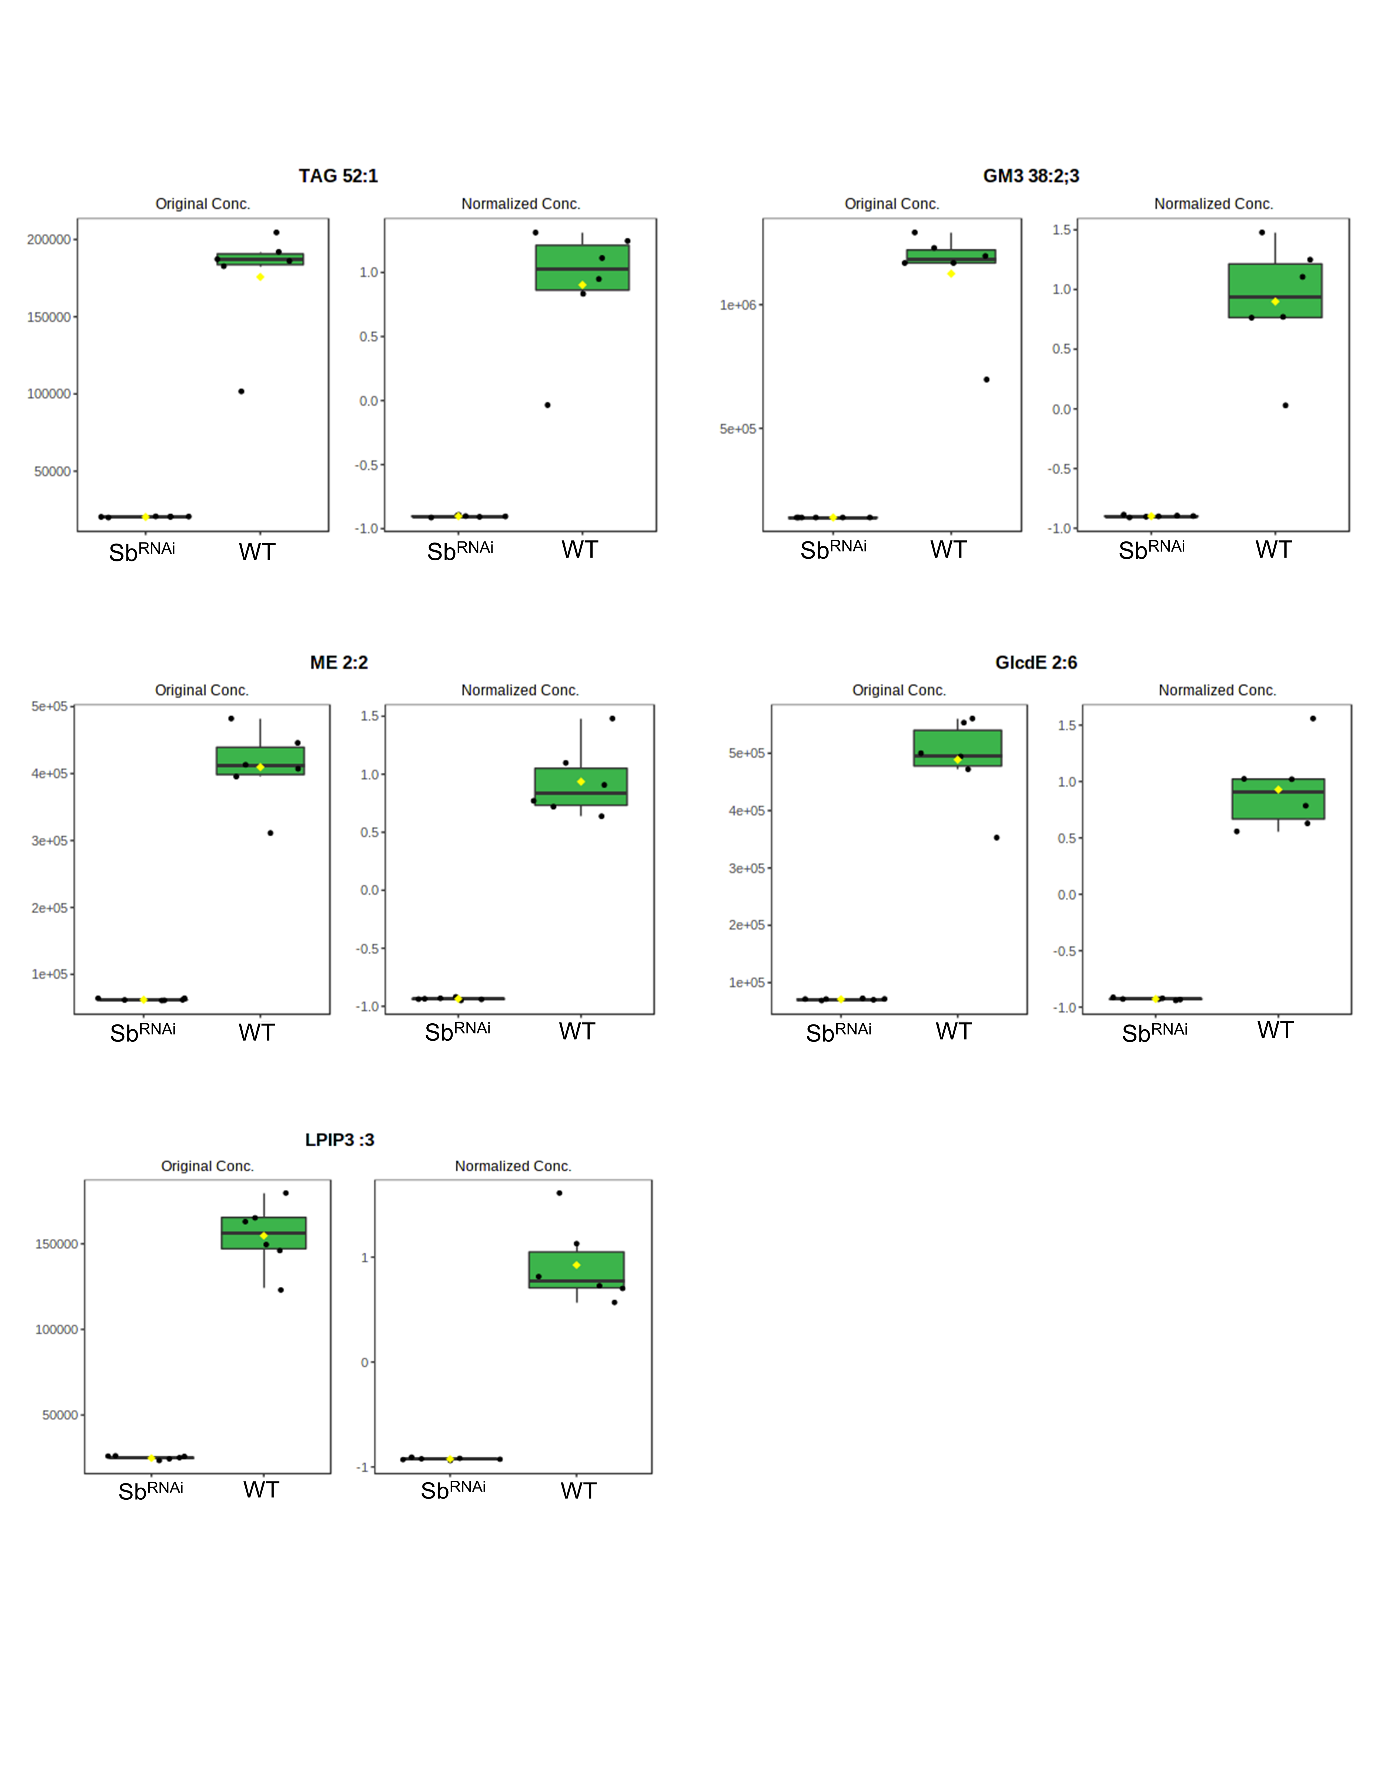


C

**Fig. S3. Graph representing fold change analysis of significantly up and down-regulated lipid species obtained from LC-MS data (A). There were 48 significantly downregulated and 65 upregulated lipid species while 118 were unaltered. The top five significantly upregulated and downregulated lipid species were TAG 54:2, PIP37:2, MADAG 54:7, CPDDAG 35:0, and EE 8:2 (panel B), and GM38:2;3, TAG 52:1, GlcdE 2:6, LPIP3:3 and ME 2:2 respectively (panel C).**


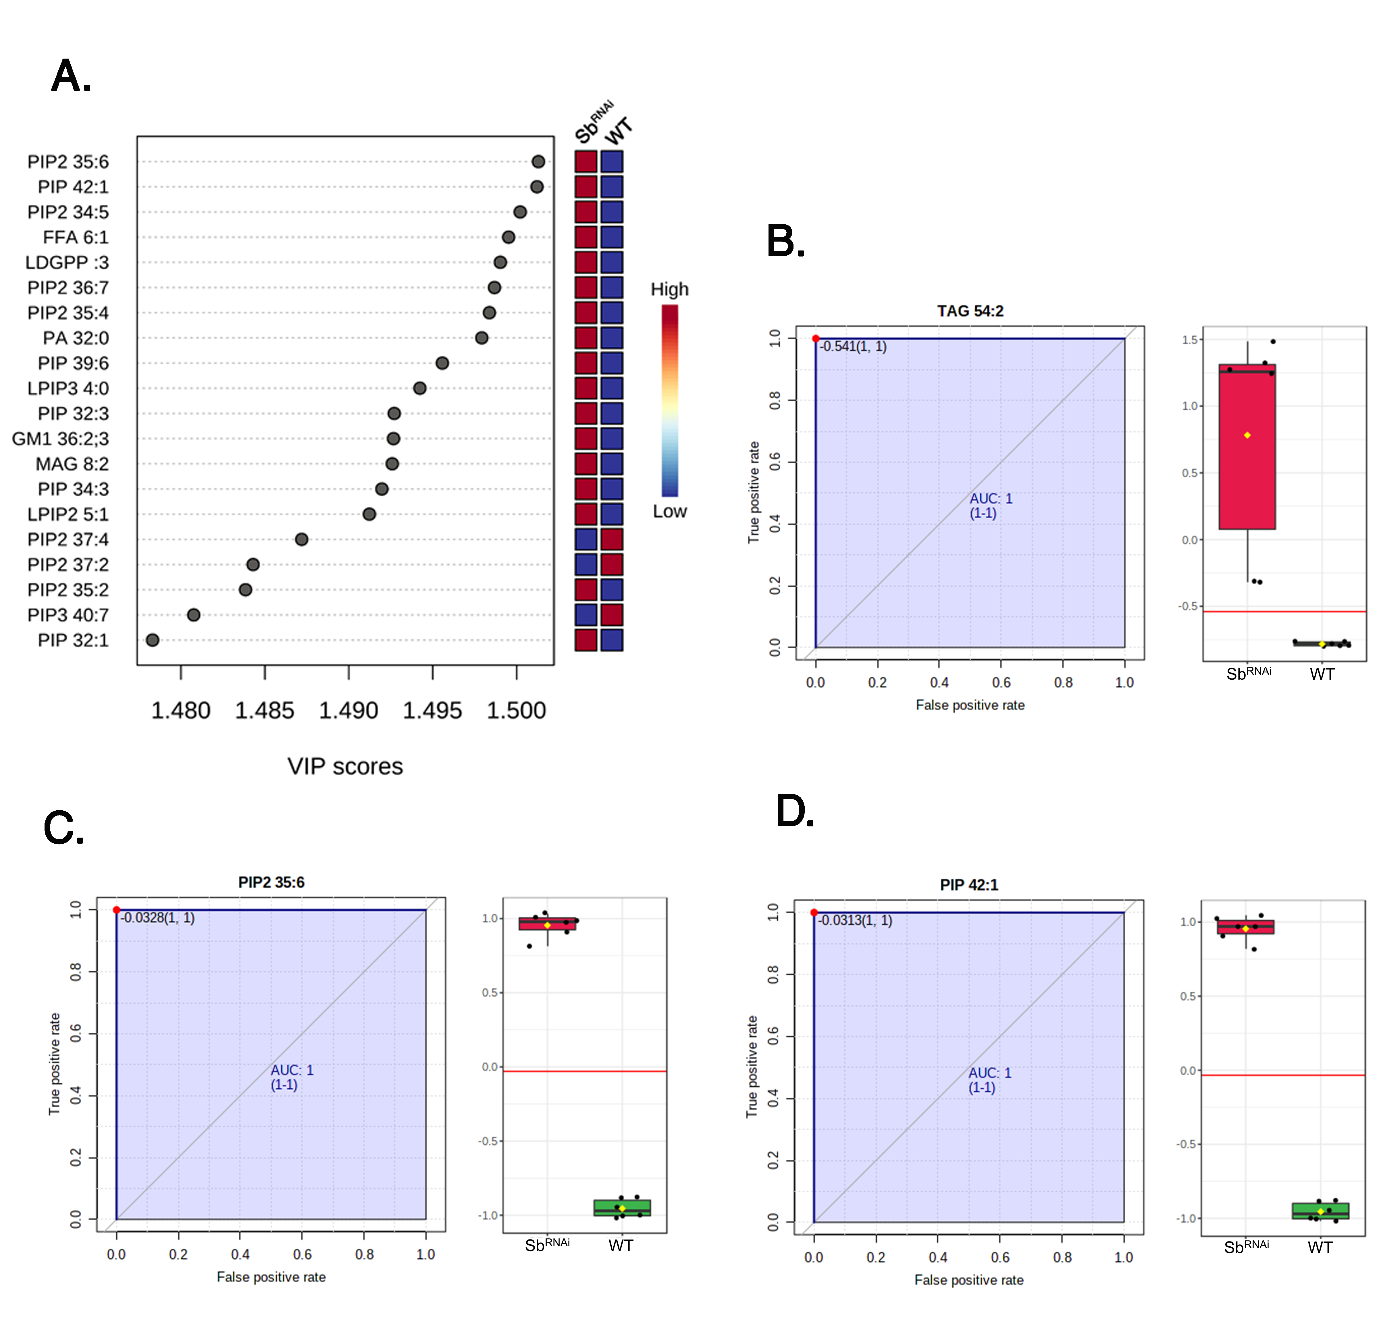


**Fig. S4. The Variable importance in projection (VIP) score is a weighted sum of squares of sPLS-DA loadings taking into account the amount of explained *Y*-variation in each dimension (Top 20 features).**


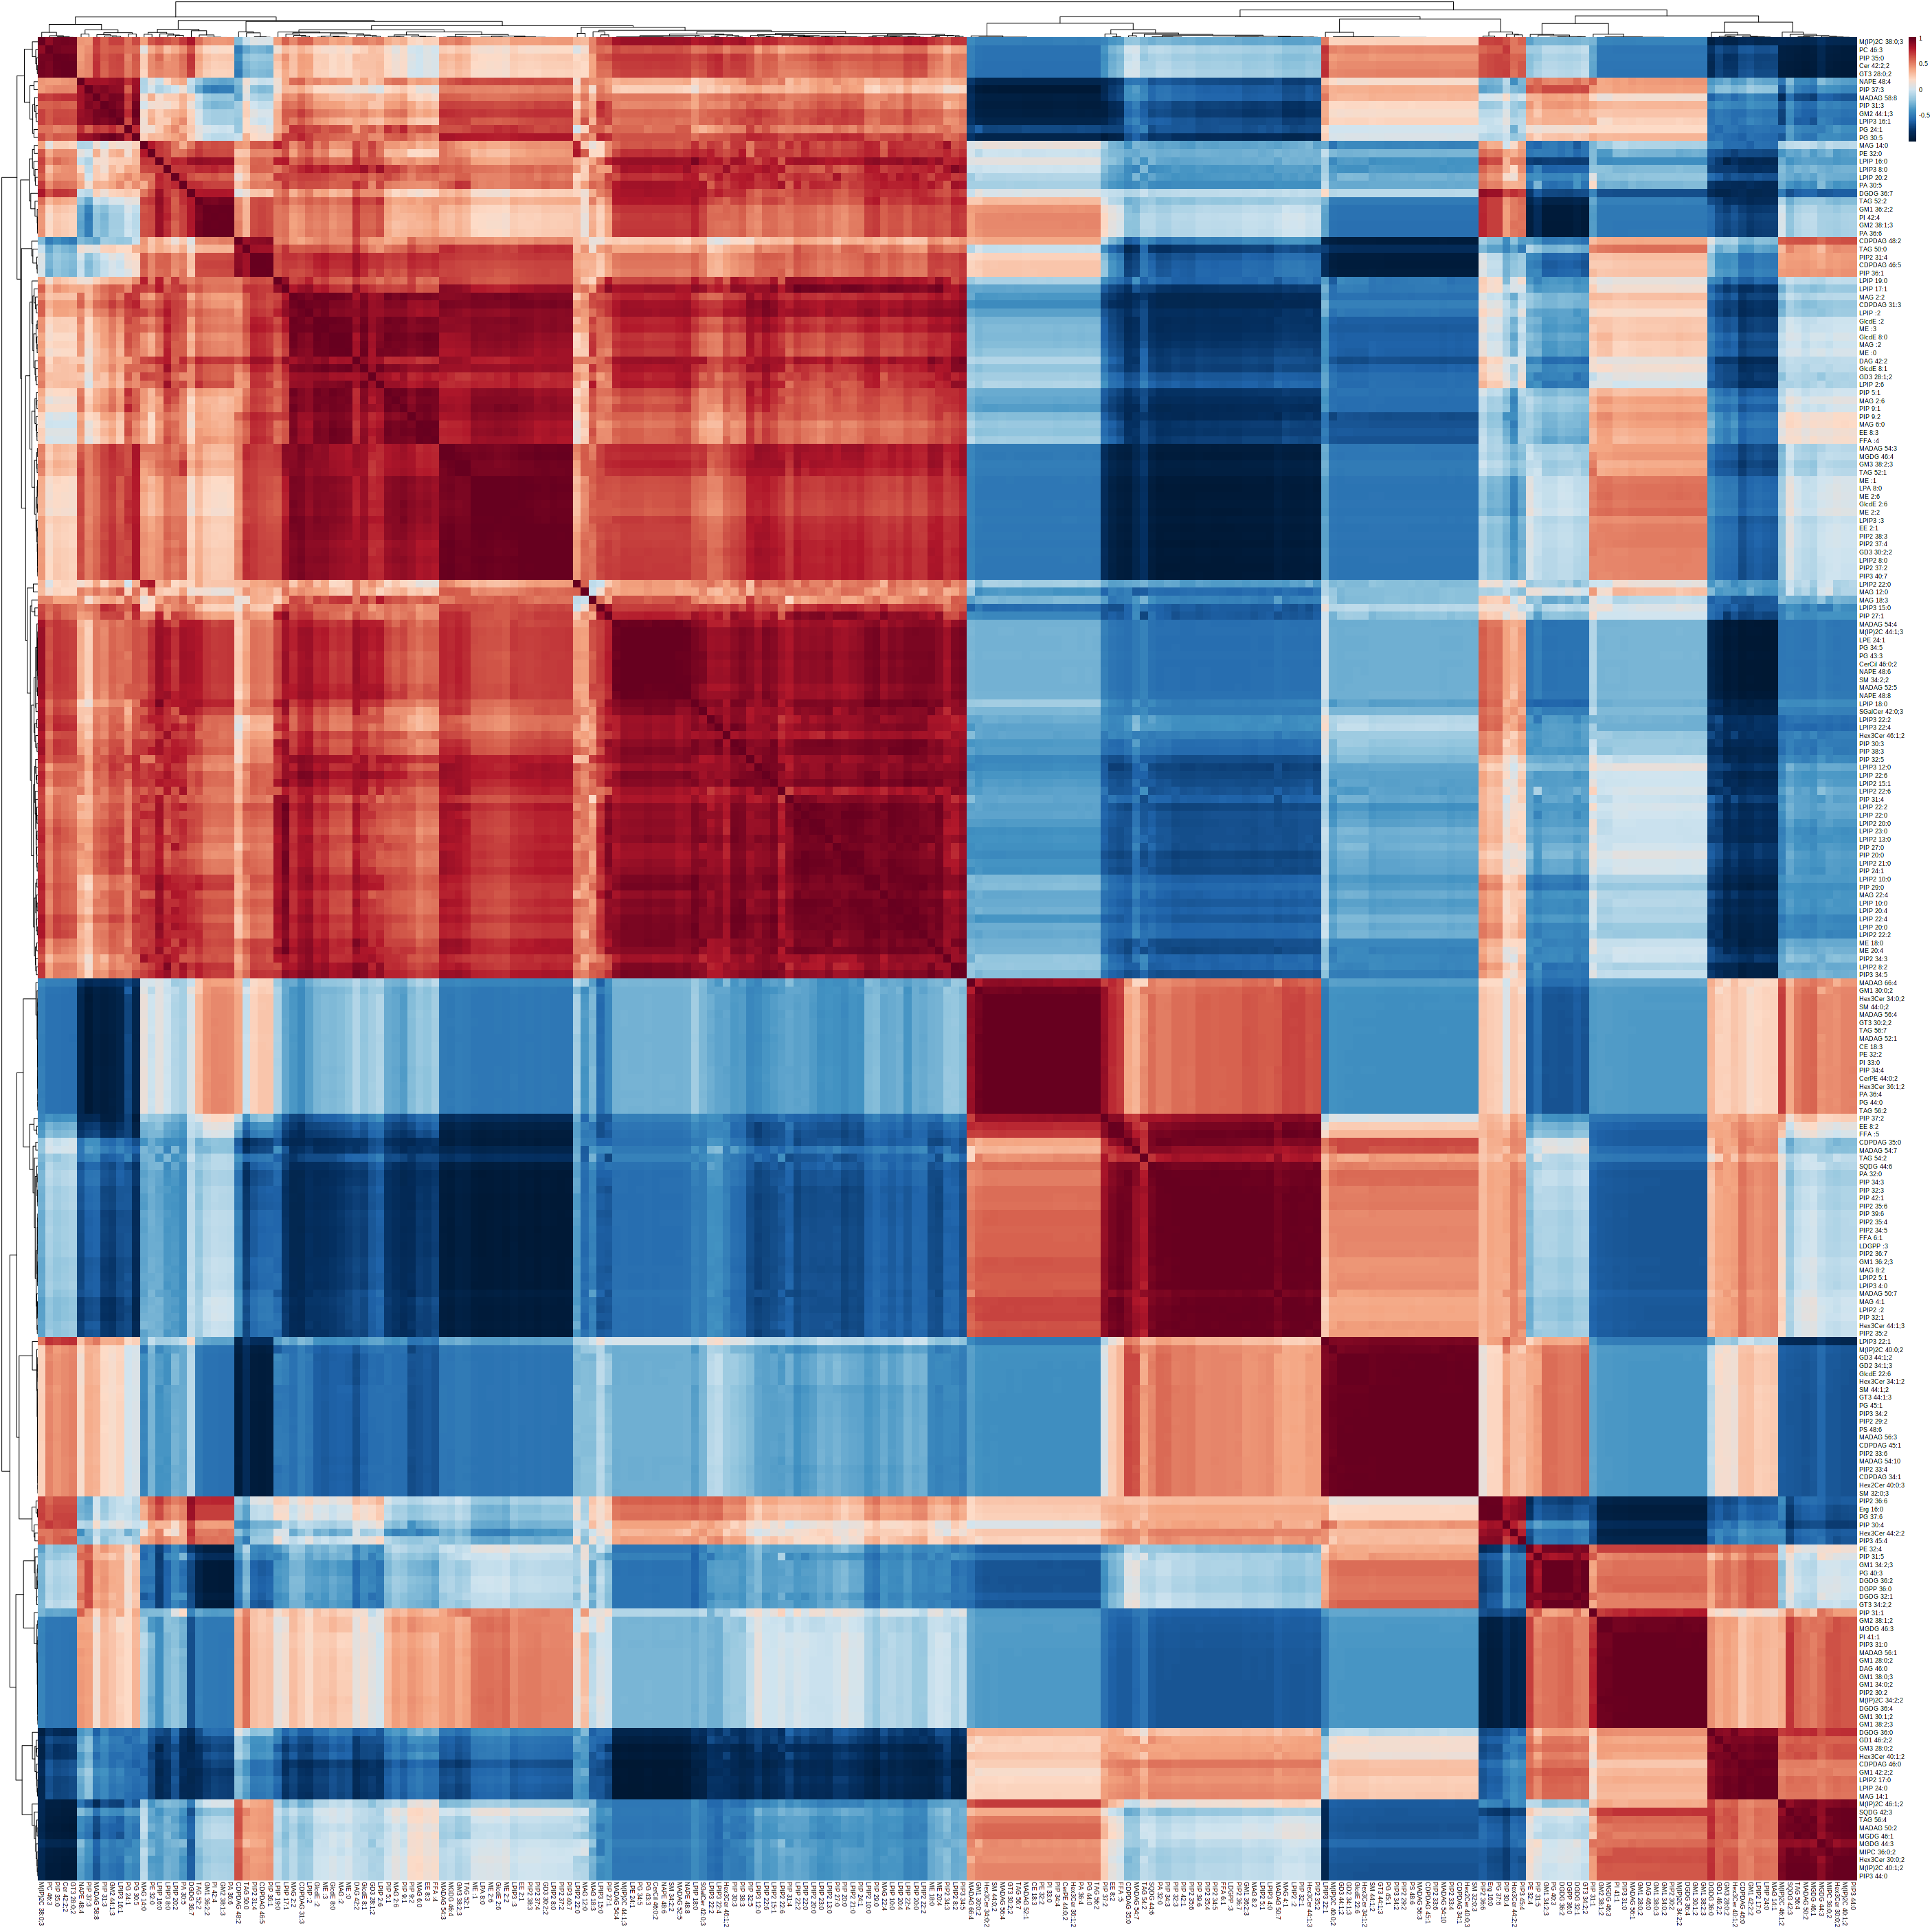


**Fig. S5. Representing correlation heat map. The lower the signal of intensities the bluer the heatmap color and the higher signal intensities are denoted in red color.**

**Table 1: Top 50 lipid species identified from Volcano plot**

| **Sr. No.** | **Peaks(mz/rt)** | **FC** | **log2(FC)** | **raw.pval** | **-log10(p)** |
| --- | --- | --- | --- | --- | --- |
| 1 | PIP2 35:6 | 4.5118 | 2.1737 | 6.43E-13 | 12.192 |
| 2 | PIP 42:1 | 4.5154 | 2.1748 | 7.24E-13 | 12.14 |
| 3 | PIP2 34:5 | 4.4182 | 2.1435 | 2.39E-12 | 11.622 |
| 4 | FFA 6:1 | 4.3891 | 2.1339 | 4.70176-12 | 11.328 |
| 5 | LDGPP :3 | 4.4093 | 2.1406 | 7.2880-12 | 11.137 |
| 6 | PIP2 36:7 | 4.3827 | 2.1318 | 9.69E-12 | 11.014 |
| 7 | PIP2 35:4 | 4.3129 | 2.1087 | 1.23E-11 | 10.911 |
| 8 | PA 32:0 | 4.504 | 2.1712 | 1.72E-11 | 10.766 |
| 9 | PIP 39:6 | 4.4128 | 2.1417 | 7.25E-11 | 10.14 |
| 10 | LPIP3 4:0 | 4.4715 | 2.1608 | 1.41E-10 | 9.8506 |
| 11 | PIP 32:3 | 4.5266 | 2.1784 | 2.75E-10 | 9.5605 |
| 12 | GM1 36:2;3 | 4.691 | 2.2299 | 2.80E-10 | 9.5533 |
| 13 | MAG 8:2 | 4.454 | 2.1551 | 2.88E-10 | 9.5403 |
| 14 | PIP 34:3 | 4.6152 | 2.21E+00 | 3.68E-10 | 9.4342 |
| 15 | LPIP2 5:1 | 4.63E+00 | 2.211 | 4.86E-10 | 9.3133 |
| 16 | PIP2 37:4 | 0.16114 | -2.6336 | 1.7562E-09 | 8.7554 |
| 17 | PIP2 37:2 | 1.64E-01 | -2.6063 | 3.7284c-09 | 8.43E+00 |
| 18 | PIP3 40:7 | 0.16165 | -2.6291 | 8.19E-09 | 8.0866 |
| 19 | PIP2 35:2 | 4.913 | 2.2966 | 4.15E-09 | 8.38E+00 |
| 20 | PIP 32:1 | 4.65 | 2.2172 | 1.32450-08 | 7.878 |
| 21 | LPIP2:2 | 4.6366 | 2.2131 | 1.34E-08 | 7.8714 |
| 22 | LPIP2 8:0 | 1.60E-01 | -2.642 | 1.35696-08 | 7.8674 |
| 23 | LPA 8:0 | 1.41E-01 | -2.8293 | 1.43716-08 | 7.8425 |
| 24 | EE 2:1 | 0.15234 | -2.7146 | 1.6856c-08 | 7.7732 |
| 25 | ME 2:2 | 0.12722 | -2.9746 | 4.20E-08 | 7.3763 |
| 26 | ME 2:6 | 0.13824 | -2.8548 | 4.42346-08 | 7.3542 |
| 27 | PIP2 38:3 | 0.14784 | -2.7578 | 4.8785c-08 | 7.3117 |
| 28 | MAG 4:1 | 4.6031 | 2.2026 | 5.22E-08 | 7.2819 |
| 29 | Hex3Cer 44:1;3 | 5.0274 | 2.3298 | 6.49E-08 | 7.1877 |
| 30 | GD3 30:2;2 | 0.14954 | -2.7414 | 6.63E-08 | 7.1784 |
| 31 | ME :1 | 0.14062 | -2.8301 | 6.89E-08 | 7.1619 |
| 32 | CDPDAG 35:0 | 5.4052 | 2.4343 | 1.41E-07 | 6.8518 |
| 33 | MGDG 46:4 | 0.15368 | -2.702 | 1.69E-07 | 6.7715 |
| 34 | GlcdE 2:6 | 0.12177 | -3.0378 | 1.98550-07 | 6.7021 |
| 35 | SQDG 44:6 | 5.0942 | 2.3489 | 3.37E-07 | 6.4723 |
| 36 | LPIP3 :3 | 0.13405 | -2.8992 | 3.50E-07 | 6.4557 |
| 37 | FFA :5 | 4.7465 | 2.2469 | 4.18E-07 | 6.3784 |
| 38 | MADAG 54:3 | 0.13501 | -2.8888 | 6.39E-07 | 6.1945 |
| 39 | MADAG 50:7 | 5.0751 | 2.3434 | 1.10E-06 | 5.9598 |
| 40 | TAG 52:1 | 0.096344 | -3.3757 | 4.27236-06 | 5.3693 |
| 41 | GM3 38:2:3 | 0.1027 | -3.2834 | 5.84E-06 | 5.2333 |
| 42 | EE 8:2 | 5.2874 | 2.4026 | 1.13E-05 | 4.9484 |
| 43 | MADAG 54:7 | 6.8024 | 2.766 | 7.92E-05 | 4.1014 |
| 44 | PIP 37:2 | 7.6977 | 2.9444 | 0.00049246 | 3.3076 |
| 45 | TAG 54:2 | 12.029 | 3.5884 | 0.00117 | 2.9318 |
| 46 | PG 30:5 | 0.42104 | -1.248 | 0.0018574 | 2.7311 |
| 47 | TAG 50:0 | 0.3687 | -1.4395 | 0.0030954 | 2.5093 |
| 48 | GM2 44:1;3 | 0.48914 | -1.0317 | 0.0093353 | 2.0299 |
| 49 | PIP 31:3 | 0.49052 | -1.0276 | 0.013862 | 1.8582 |
| 50 | NAPE 48:4 | 0.47556 | -1.0723 | 0.021921 | 1.6591 |
